# Supplementary material for: Characterization of New Allergens from the Venom of the European Paper Wasp Polistes dominula
Source: Toxins (Basel). 2021 Aug 10;13(8):559. doi: 10.3390/toxins13080559 (PMC8402607; doi:10.3390/toxins13080559)
Supplement: Supplementary file 1 [file toxins-13-00559-s001.zip › Table_S1.xlsx]

## Sheet: Italy (in vitro)
Clinical data of patients recruited in Ancona (Italy). The patients' sera were used for in vitro assessment of the allergenic potential of IRP30, PLA2, PLELL and VEGF C.
Abbreviations	AM	Apis mellifera
	PD	Polistes dominula
	USV	Unknown small vespid
	VC	Vespa crabro
	VS	Vespula spp.
PDV (mono)
				Intradermal test				Immuno-CAP [kU/l]											Tryptase (ng/ml)
Sex	Age	Reaction severity (Mueller)	Culprit insect	Vespula spp.	P. dominula	V. crabro	A. mellifera	Total IgE	sIgE VG	sIgE PD	sIgE VC	sIgE AM	sIgE rVes v1	sIgE rVes v5	sIgE rPol d5	sIgE rApi m 1	sIgE rApi m 10	CCD
M	25	2	USV	-	+		-	520	1.470	5.360	0.120	0.220	1.170	2.630	0.010				6.8
M	24	3	USV	-	+		-	58.30	1.780	16.500	0.080	0.080	1.780	0.030	0.240	0.00			4.1
M	64	4	PD	-	+		-	65.10	0.150	4.640	0.340	0.030	0.039	0.030	0.010	0.00			4.3
M	48	4	USV	-	+		-	45.2	0.060	2.220		0.040	0.030	0.030	0.430	0.020			7.0
F	47	3	USV	-	+		-	31.2	0.030	0.910	0.050	0.040	0.000	0.00	0.430				5.7
M	42	4	PD	-	+	-	-	78.6	0.820	3.580	0.340	0.260	0.130	0.000	0.180	0.000	0.000	0.060	10.3
M	30	3	PD	-	+	-	-		0.540	3.210	0.060	0.300	0.080	0.580	1.780	0.000	0.000	0.010	2.6
M	60	4	VS	-	+	-	-	16.4	0.650	1.050	0.070	0.510	0.070	1.080	1.000	0.020	0.010	0.000	2.8
F	72	4	PD	-	+	-	-	50.0	1.480	3.550	0.590	0.010	1.710	0.070	0.060	0.000			3.3
M	60	4	PD	-	+	-	-	45.2	0.440	0.930	0.780	0.140	0.050	0.090	0.140	0.000		0.000	11.1
M	37	2	PD	-	+	-	-	220	2.740	8.250	0.570	0.090	3.360	0.480	0.940	0.010		0.030	3.7
M	56	2	USV	-	+		-	30.5	0.000	1.780	0.010	0.020	0.000	0.000	0.070				32.1
M	62	3	USV	-	+		-	20.3	0.100	4.620	0.180	0.030	0.000	0.080	1.150				2.0
M	40	3	PD	-	+		-	60.9	0.030	1.310	0.020	0.030	0.000	0.090	1.310				4.5
M	47	4	USV	-	+		-	29.4	0.090	0.330	0.010	0.010	0.090	0.000	0.000				4.2
M	43	4	USV	-	+		-		0.080	5.230	0.080	0.070	0.000	0.150	5.410				3.4
YJV (mono)
				Intradermal test				Immuno-CAP [kU/l]											Tryptase (ng/ml)
Sex	Age	Reaction severity (Mueller)	Culprit insect	Vespula spp.	P. dominula	V. crabro	A. mellifera	Total IgE	sIgE VG	sIgE PD	sIgE VC	sIgE AM	sIgE rVes v1	sIgE rVes v5	sIgE rPol d5	sIgE rApi m 1	sIgE rApi m 10	CCD
M	49	4	VS	+	-	-	-	356	0.910	0.060	0.390	0.120	0.010	0.360	0.070	0.010		0.120	4.8
F	74	3	VS	+	-		-	31.2	2.700	0.120	0.080	0.020	1150	0.680	0.010				5.0
M	50	4	VS	+	-	+	-	301	3.030	0.620	1.390	0.98	0.490	2.420	0.560	0.02		0.390	10.9
M	49	4	USV	+	-	-	-	29.8	0.230	0.020		0.010	0.100	0.130	0.000				5.1
M	54	4	VS	+	-	+	-	58.3	11.500	2.660	0.440	0.030	12.800	0.370	0.030				4.5
M	68	4	VC	+	-	+	-	163	1.140	0.010	0.300	0.100	0.200	0.820	0.000	0.030		0.000	6.6
M	50	3	VS	+	-	-	-	27	0.850	0.140	0.010	0.060	0.000	0.810	0.100				5.4
M	58	4	VS	+	-	+	-	49.1	16.500	0.100	4.500	0.700	14.600	1.200	0.090	0.000		0.710	3.6
F	65	3	VS	+	-	+	-	127	1.240	1.680	0.010	0.000	0.000	1.820	2.190				3.7
M	36	2	VS	+	-		-	108	5.040	0.240	0.560	0.010	0.040	4.770	0.950	0.000		0.000	4.9
F	52	3	VS	+	-	-	-	173	0.180	0.90	0.100	0.050	0.000	0.190	0.000				7.7
M	35	4	VS	+	-		-	160	2.700	0.150	0.020	0.010	3.350	0.110	0.000				4.4
F	66	3	VS	+	-		-	70.1	4.390	0.100	0.250	0.170	0.100	3.500	0.100	0.000			3.9
M	63	4	VS	+	-	-	-	20.6	1.560	0.030	0.010	0.030	2.750	0.060	0.000				4.3
F	63	4	VS	+	-	+	-	219	9.080	1.100	0.050	0.080	0.430	12.600	0.100				6.9
F	68	3	VS	+	-	-	-	22.3	2.130	0.090	0.100	0.060	1.530	0.710	0.090				5.3
F	72	3	VS	+	-		-	19.1	0.580	0.060	0.030	0.020	0.110	0.300	0.000				3.9
M	50	4	VS	+	-	+	-	27.3	1050	0.030	0.130	0.700	0.040	0.740	0.000	0.000		0.000	5.4
HBV (mono)
				Intradermal test			Immuno-CAP [kU/l]													Tryptase (ng/ml)
Sex	Age	Reaction severity (Mueller)	Culprit insect	Vespula spp.	P. dominula	A. mellifera	Total IgE	sIgE VG	sIgE PD	sIgE AM	sIgE rVes v1	sIgE rVes v5	sIgE rPol d5	sIgE rApi m 1	sIgE rApi m 2	sIgE rApi m 3	sIgE rApi m 5	sIgE rApi m 10	CCD
M	62	2	AM	-	-	+	59.3	0.030	0.040	0.530		0.00	0.00	0.00	0.00		0.00	0.790		4.6
M	43	4	AM	-	-	+		0.160	0.940	13.500		0.040	0.040	6.060	0.010	0.640	0.180	4.340		20.1
F	67	2	AM	-	-	+	46.1	0.00	0.00	1.490	0.020	0.00	0.00	0.070	1.370	0.00	0.210	0.010		8.30
M	64	4	AM	-	-	+	108			8.950				4.090	1.680		0.020	0.400		8.1
M	18	2	AM	-	-	+	46.9	0.00	0.000	28.900		0.00	0.00	17.300	0.030	3.340	2.080	8.300		5
M	46	2	AM	-	-	+	162	1.61	0.70	25.500	0.90	0.46	0.28	4.080	13.400		4.37	18.30		4.2
M	67	4	AM	-	-	+	37.9			1.170		0.00	0.00	0.940	0.080	0.320	0.000	0.020		12.2
M	35	2	AM	-	-	+	48.400			16.600				3.370				1.800		4.0
M	49	1	AM	-	-	+	19.7	0.01	0.01	7.350				6.900	0.00		0.00	0.040	0.01	3.6
M	78	4	AM	-	-	+	34.7	0.170	0.170	4.360	0.02	0.00	0.00	2.070	0.00		0.250	0.020		3.8
M	50	3	AM	-	-	+	193	0.31	0.100	67.700				9.690				3.910		5.1
M	34	4	AM	-	-	+	203	1.110	0.850	58.300	0.130	0.180	0.390	17.900				9.740		2.4
M	33	3	AM	-	-	+	58.2	1.07	1.03	4.950				0.610				2.020		1.5
M	36	4	AM	-	-	+	46.2	0.080	0.960	5.430	0.02	0.090	0.790	0.310	2.370	0.200	0.400	3.090	0.050	12.4
F	42	4	AM	-	-	+	120	0.010	0.010	10.300				8.200	7.370	0.030	0.010	0.040	0.010	6.8
F	35	3	AM	-	-	+	115	0.210	0.100	8.70				3.790				0.050	0.650	6.3
F	7	3	AM			+	54.7	0.150	0.130	34.800				27.000	2.200	0.02	1.600	0.620	0.540	3.2
M	30	3	AM	-	-	+	30.3	0.04	0.160	2.330				0.500					0.020	5.0
M	36	2	AM	-	-	+	247	0.240	0.680	29.900				2.070					0.780	3.5
M	5	4	AM			+	169	0.120	0.180	62.200				62.300						4.7
M	68	4	AM	-	-	+	240	0.190	0.300	14.800				0.940					0.220	6.6
M	64	2	AM	-	-	+	599			1.980				0.210						3.5
M	54	3	AM	-	-	+	78.2	0.070	0.700	17.300		0.000	0.000	5.390						1.4
M	29	2	AM	-	-	+	210			4.370				0.080						6.1
F	47	3	AM	-	-	+	137	0.130	0.030	15.500	0.010	0.120	0.090	4.220						3.5
M	46	4	AM	-	-	+	34.1	0.01	0.01	0.710				0.560						7.1
M	29	3	AM	-	-	+	89.5	0.01	0.01	2.780				0.190						2.7
M	38	3	AM	-	-	+	57.5	0.050	0.030	0.410				0.320						5.7
F	23	3	AM	-	-	+	54.6			1.090				0.460						4.8
YJV & PDV
				Intradermal test				Immuno-CAP [kU/l]												Tryptase (ng/ml)
Sex	Age	Reaction severity (Mueller)	Culprit insect	Vespula spp.	P. dominula	V. crabro	A. mellifera	Total IgE	sIgE VG	sIgE PD	sIgE VC	sIgE AM	sIgE rVes v1	sIgE rVes v5	sIgE rPol d5	sIgE rApi m 1	sIgE rApi m 5	sIgE rApi m 10	CCD
M	56	4	VC	+	+	+	+	245	11.900	7.090	3.280	2.070	2.860	7.050	5.360	0.070			0.670	4.3
M	63	4	VC	+	+	+	-	12.8	1.940	0.670	0.120	0.090	0.330	2.040	0.930					4.7
M	57	3	VC	+	+	+	-	985	69.300	56.100	46.300	0.800	80.100	22.700	20.100	0.010			0.120	15.4
M	48	3	USV	+	+		-	98	2.290	2.230	0.120	0.020	0.030	3.020	2.770					3.8
M	51	2	USV	+	+	+	-		>100	>100	52.900	10.000	64.100	61.100	75.500	0.100			0.150	2.6
F	59	2	VS	+	+		-	367	44.300	11.300	4.470	0.100	14.700	51.000	16.100	0.010				4.2
M	59	2	VC	+	+	+	+	1769	60.000	5.650	17.100	1.200	51.900	14.700	5.180					3.1
M	27	2	USV	+	+		-		5.580	>100	10.700	0.510	6.630	0.620	3.490	0.030	36.300	0.350	0.190	2.3
F	31	2	VC	+	+		-	115	6.650	3.690	0.720	0.040	4.820	2.500	1.780	0.000				7.0
M	62	4	USV	+	+		-	56.5	3.200	1.420	0.220	0.020	1.220	1.530	2.030	0.000				6.9
M	48	3	USV	+	+	+	-		18.800	27.700	3.030	0.780	0.060	10.600	22.400	0.010				2.8
M	55	4	VC	+	+	+	-	110	9.000	3.280	2.760	0.210	1.530	5.710	0.990	0.010			0.020	3.4
M	71	3	VC	+	+	+	+	280	>100	93.900	7.970	6.100	0.570	>100	>100	0.360	1.640	0.320	4.250	7.0
M	67	4	VC	+	+	+	-		32.200	21.600	1.380	0.100	2.390	27.900	29.800	0.040				7.9
M	58	2	VC	+	+	+	+	492	5.570	9.290	2.740	2.790	3.220	4.220	6.340	1.010			0.550	4.0
M	31	3	PD					89.8	5.510	7.700	1.580	0.030	5.810	0.160	0.940	0.010				6.3
M	61	3	VS	+	+	+	-	377	3.480	2.460	0.880	0.760	0.540	2.960	2.340	0.020			0.240	5.6
M	60	3	USV	+	+	+	+	123	14.000	14.000	6.510	10.800	3.570	5.140	7.270	0.130	2.280	0.120	3.200	4.2
M	37	4	VC	+	+	+	-	166	6.200	6.150	0.210	0.060	6.560	0.590	1.390	0.010			0.010	5.1
M	47	4	VS	+	+	+	-	1798	85.000	22.200	10.900	0.210	33.800	87.900	37.900	0.100			0.050	3.1
F	77	3	VS	+	+	+	+	233	1.640	0.970	1.020	1.020	0.630	0.090	0.030	0.020	0.430	0.060	0.520	4.7
M	28	3	VS	+	+	+	+	428	31.800	36.800	4.390	2.52	0.540	35000	40.800	1.20			0.450	4.1
F	56	4	VS	+	+	+	-	19	0.690	0.190	0.040	0.030	0.450	0.230	0.060					4.3
M	31	3	VS	+	+	+	-	110	4.050	1.310	0.070	0.260	4.650	0.290	0.210	0.010		0.050	0.01	5.3
M	64	4	PD	+	+		-	988	40.900	93.600		3.710	24.900	31.500	60.30	0.010			0.040	5.5
F	30	4	VS	+	+	+	-	431	>100	11.60	6.220	1.660	3.200	25.200	6.060	0.130			1.020	2.3
M	32	4	PD	+	+	2	-	312	49.900	>100	2.420	0.050	25.100	53.100	>100	0.000			0.000	1.5
M	33	2	USV	+	+	2	-	105	6.220	6.660	3.180	1.010	3.090	2.350	2.880	0.120			0.000	2.9
F	65	3	VC	+	+	+	-	109	3.860	4.590	1.040	0.880	2.330	1.520	1.600	0.100			0.000	5.4
M	57	3	USV	+	+	2	-	308	93.300	>100	17.700	0.400	67.600	40.700	76.600	0.100			0.000	4.6
M	66	4	VC	+	+	+	+	22.2	8.970	1.630	2.560	1.290	5.410	2.070	0.490	0.000			0.400	3.9
F	69	3	USV	+	+	2	-	561	1.860	3.930	0.050	0.040	0.030	4.330	7.480	0.020				6

## Sheet: Germany (BAT)
Clinical data of patients recruited in Munich (Germany). The patients' blood samples were used for basophil activation tests with Api m 1 and PDV PLA2.
Abbreviations	AM	Apis mellifera
	EH	European hornet
	VS	Vespula spp.
Patient ID	Allergy	Sensitization	Intradermal test			sIgE (ImmunoCAP) [kU/L]																						Immulite 2000 [kU/L]
Diagnosed venom allergy	Diagnosed venom allergy		A. mellifera	Vespula spp.	tIgE (kU/L)	A. mellifera (i1)	class	rApi m1 (i208)	class	rApi m2 (i214)	class	rApi m3 (i215)	class	rApi m5 (i216)	class	rApi m10 (i217)	class	YJV (i3)	class	rVesv1 (i211)	class	rVesv5 (i209)	class	European hornet (i75)	CCD, MUXF3 (Bromelain - O214)	class	Tryptase (TrypCAP Immuno-CAP 250 µg/l)	tIgE IU/ml	HBV I1	class	rApi m2 (A46)	class	YJV (I3)	class	CCD, MUXF3 (Bromelain - O214)	class
M1	VS			pos (0.01)				neg				neg		neg		neg				neg		1.51	2				19	24.3	neg		neg		2.11	2	neg
M2	VS	AM	pos (0.01)	pos (0.01)				neg				neg		neg		neg				neg		0.8	2				5.29	36	1.63	2	1.37	2	2.78	2	neg
M3	VS		neg	pos (0.001)				neg		neg		neg		neg		neg				neg		9.31	3
M4	AM		pos (0.0001)	pos (0.1)				3.15	2			1.38	2	7.44	3	5.01	3			neg		neg					3.26	73.5	11	3	0.993	2	1.3	2	1.34	2
M5	AM/VS		pos (0.0001)	pos (0.001)				0.63	1	13.4	3	neg		0.35	1	neg				0.52	1	10.7	3				5.08	364	7.39	3			9.55	3	1.77	2
M6	VS/EH	AM		pos (0.01)		26.4	4	9.69	3	0.9	2	1.67	2	neg		13.7	3	2.37	2	neg		2.37	2	0.47	neg		36.6	14.4
M8	VS		neg	pos (0.0001)	61.7		0		0		0		0		0		0		5		4		3			0	3.14
M9	VS		neg	pos (0.0001)	128	neg		neg		neg		neg		neg		neg		14.2	3	neg		89.7	5		neg		6.31
M10	VS	AM	neg	pos (0.0001)	934	1.86	2	neg		neg		neg		neg		neg		16.2	3	neg		16.9	3		neg		4.41
M11	VS		neg	pos (0.01)		neg		neg			1	neg			1	neg			3		2		3		neg
M12	VS		neg	pos (0.001)	90.5	neg		neg		neg		neg		neg		neg		13.2	3	7.55	3	7.38	3		neg		3.35
M13	AM		pos (0.001)	neg (0.1)	103		4		3		4	neg	0		2	neg	0	neg	0		0		0			0	4.06
M14	AM		pos (0.0001)	neg (0.1)	146		4		2		5		3		2		3						1				2.81
M15	AM/VS				20.4		2		2		3		1		0		0		3		3		0			0	6.58
M16	AM/VS		pos (0.0001)	neg	77.1		3		2		0		0		2		2		2		2		2			2
M18	AM/VS		pos (0.01)	pos (0.01)	144	8.38	3	0.69	1	6.91	3	0.19	0	9.71	3	0.34	0	2.61	2	1.06	2	0.13	0		13.9	3
M19	AM		pos (0.0001)	neg	93.8	>100	6	37.3	4	18.7	4	1.43	2		0	1.28	2	0.463	1	<0.1	0		0		2.85	2	2.57
M21	AM	VS	pos (0.0001)	neg	127	> 100	6	34.7	4			12.7	3	8.72	3	2.54	2			0.72	2	0.18	0				5.51				<0.1	0	2.74	2	<0.1	0

## Sheet: Spain (BAT)
Clinical data of patients recruited inBarcelona (Spain). The patients' blood samples were used for basophil activation tests with Api m 1 and PDV PLA2.
Patient ID	Reaction	Intradermal test			tIgE (kU/L)	sIgE (kU/L) (ImmunoCAP)				sIgE components (kU/L) (ImmunoCAP)								Tryptase (ng/ml)
		A. mellifera	Vespula spp.	P. dominula		A. mellifera (i1)	Vespula spp. (i3)	Polistes spp. (i4)	P. dominula (i77)	Api m 1 (i208)	rApi m2 (i214)	rApi m3 (i215)	rApi m5 (i216)	rApi m10 (i217)	Ves v 1 (i211)	Ves v 5 (i209)	Pol d 5 (i210)
B1	Large local + dyspnea	Negative	Negative	0.001	96.5	0.13	11.6		22.1	0					14.3	0.23	5.62	4.63
B3	Anaphylactic shock	Negative	0.1	1	13.7	0	3.2		3.25	0					3.09	0.21	0.08	7.33
B4	Anaphylactic shock (4)	0.001	0.01	0.01	144	10.9	4.11	3.25	4.44	5.39	1	0.05	4.54	0.78	2.36	0.64	0.79
B6	Anaphylactic shock (4)	0.1	Negative	Negative	11	0.94	0.01	0	0	0.54	0	0.07	0	0.43	0.02	0	0
B7	Systemic reaction grade II (2)	0.001	Negative	Negative	94.1	1.75	0.31	0.28	0.38	1.07	0.32	0.01	0.12	0.04	0.05	0	0.14
B8	Anaphylactic shock (4)	Negative	0.1	0.1	427	0.01	51.4	90	>100	0	0.05	0	0.01	0.01	0.97	>100	>100
B9	Large local	Negative	Negative	Negative	40.5	0.04	1.21	1.33	1.65						0.92	0.13	0.55
B10	Anaphylactic shock	Negative	Negative	0.01	311	0.04	1.56	6.02	9.11	0.01					0.28	2.11	6.77	3.82
B11	Anaphylactic shock	Negative	1	0.1	237	0.02	10.6	15.3		0					0.03	23.1	36.1	3.67
B12	Anaphylactic shock	Negative	0.1	0.001	378	0	3.81	5.25		0					0.15	4.68	6.94	2.69
B13	Anaphylactic shock	Negative	0.1	0.0001	102	0	0.94	2.02	2.53						1.02	0.15	0.9	3.68
B14	Anaphylaxis	Negative	0.01	0.01	21.9	0	1.77	1.35	1.62						0.01	1.88	1.28	3.21
